# Supplementary material for: Scenario-based and physics-informed forecast of the evolution of 75 years of unrest at Campi Flegrei caldera (Italy)
Source: Research Square preprint supplement (doi:10.21203/rs.3.rs-5967675/v1), 2025-04-07
Supplement: Supplementary file 1 [file 0546aa8f2359a36f399d9baf.xlsx]

## Sheet: Sheet1
Table 1: Estimates of volumetric variations associated with the 4 unrest episodes, and diameters of the sill used for thermal modelling
Unrest period	DV m3 x 106	Sill diameter (m) for h=15 m	Sill diameter (m) for h=25 m
1950-1952	26 - 36	742 - 874	575 - 677
1970-1972	60 - 82	1128 - 1319	874 - 1021
1982-1984	64 - 87	1165 - 1359	902 - 1052
2007-2023	60	1128	874
