# Supplementary material for: Scenario-based and physics-informed forecast of the evolution of 75 years of unrest at Campi Flegrei caldera (Italy)
Source: Research Square preprint supplement (doi:10.21203/rs.3.rs-5967675/v1), 2025-04-07
Supplement: Supplementary file 2 [file 243f3dc9a20a645c3e5ca9cc.xlsx]

## Sheet: Sheet1
Table 2: Calculated current volume of the magma reservoir, eruptible volume, volume fraction of excess fluids and overpressure that would be generated by the injection at the current inverted rates of 8 x 106 m3/y for different model configurations
Thickness of injections (m)	Vol injections (km3) x 10-2	Vol. reservoir (km3)	Vol. eruptible (km3)	Vol. Fraction exsolved fluids (closed system)	Overpressure (MPa)
15	26 - 60 - 64 - 60	0.210935	0.16	0.240797	5.91786
15	36 - 82 - 87 - 60	0.35166	0.16	0.21262	3.97883
25	26 - 60 - 64 - 60	0.278017	0.14	0.208771	5.21732
25	36 - 82 - 87 - 60	0.278903	0.13	0.21262	5.13665
