# Supplementary material for: Scenario-based and physics-informed forecast of the evolution of 75 years of unrest at Campi Flegrei caldera (Italy)
Source: Research Square preprint supplement (doi:10.21203/rs.3.rs-5967675/v1), 2025-04-07
Supplement: Supplementary file 3 [file 7c4fa4eb04a291b6134f0626.docx]

**Scenario-based and physics-informed forecast of the evolution of 75 years of unrest at Campi Flegrei caldera (Italy)**

Luca Caricchi1, Charline Lormand1, Stefano Carlino2, Tommaso Pivetta2, Guy Simpson1

1. Department of Earth Sciences, University of Geneva, Geneva, Switzerland
2. ﻿INGV-Sezione di Napoli, Osservatorio Vesuviano, Via Diocleziano 328, 80124 Napoli, Italy

**SUPPLEMENTARY MATERIAL**

Here we present the postprocessing calculations performed considering the results of the thermal models that were run with the input parameters reported in Table S1.

The output of the model is the volume of magma within different temperature ranges at each time step (850 oC to 1200 oC at intervals of 50 oC; Tables S2-S5). We calculate the properties of magma within the different temperature intervals considering the average temperature between the isotherms (i.e. 875 oC to 1225 oC at intervals of 50 oC).

We first calculate the melt fraction (*mf*) of magma at the different temperature using the following parameterisation (Fig. S1):

(1)

Where *T* is the magma temperature, *Tsol* and *Tliq* are the solidus and liquidus temperature of the magma (850 oC, 1250 oC), respectively.

(2)

Where a, b, c, d are fitting parameters assuming the values of 40, 2.5, -7.3, 3.85 respectively. This parameters were determined by best fitting the values of the melt fraction as function of temperature from Fowler et al. (2006).

*Figure S1: Variation of the melt fraction as function of temperature as calculated from the parameterisation (Eqs. 1, 2).*

The density of the bubble and crystal free magma was assumed constant at 2500 kg/m3 and the solubility of fluids was fixed at 4 wt.% at 8 km depth (about 200 MPa lithostatic pressure) and 3wt.% at 4 km depth (about 100 MPa lithostatic pressure).

The molar volume of the excess fluid (corresponding to the depth of 4 km) at pressure of 100 MPa as function of temperature was calculated by linear fitting of the values obtained from the equation of Pitzer and Sterner (1994; Fig. S2).

The total volume of excess fluids (H2Of) was computed adding 1wt.% H2O exsolved during to the ascent of magma from 8 km to 4 km depth and the excess fluids released by magma cooling and crystallisation.

*Figure S2: Variation of the molar volume of the excess fluid phase (mainly H2O) as function of temperature calculated at 100 MPa.*

The mass percentage of fluid exsolved during magma crystallisation was calculated as:

(3)

Where H2Oi is the solubility of water at 4 km depth (i.e. 3 wt.%).

Magma compressibility as function of temperature was assumed only dependent on the volume of excess fluids and calculated following the approach of Edmonds and Woods (2018).
